# Supplementary material
Source: PubMed Central journal article supplement (PMC548982)

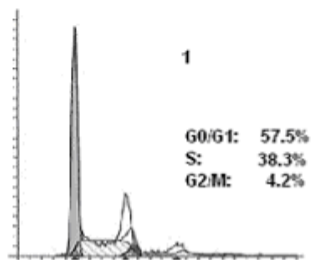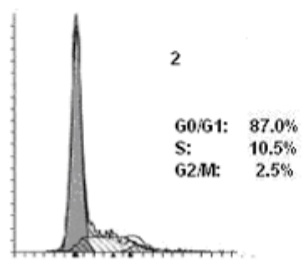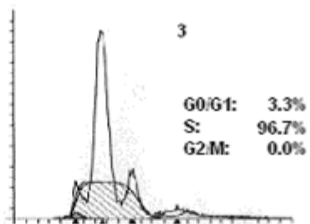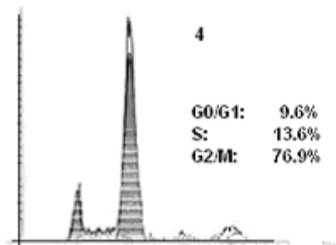

Supplement: pnas_102_7_2508__1.pdf [file pnas_102_7_2508__1.pdf]

**A**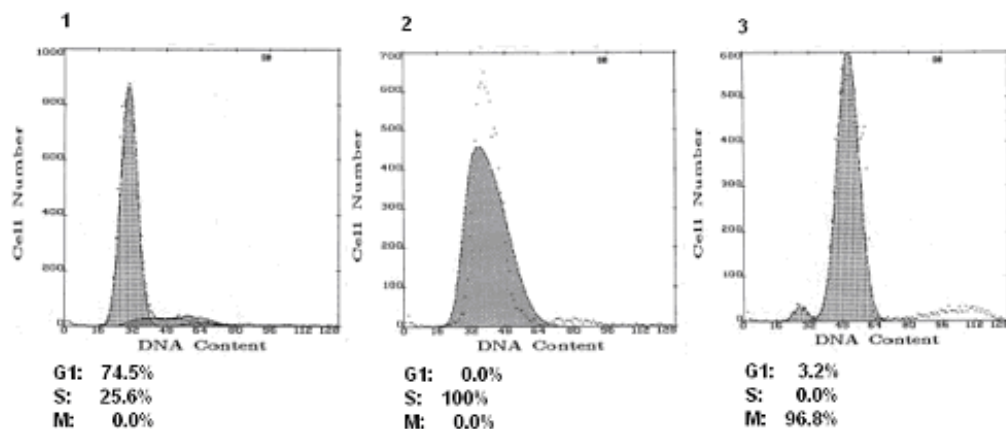**B**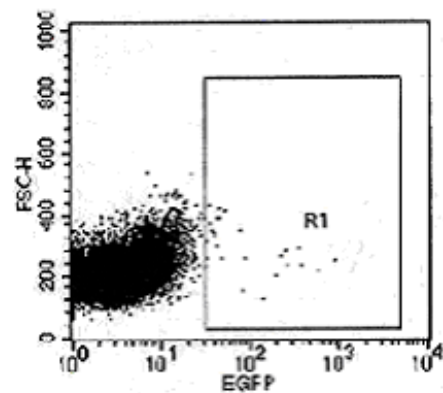

Total Events: 30,000

| Region | Events % | Gaed | X Mean | X Geo Mean |
|--------|----------|------|--------|------------|
| R1     | 29       | 0.10 | 160.36 | 88.25      |

Supplement: pnas_102_7_2508__2.pdf [file pnas_102_7_2508__2.pdf]

**A**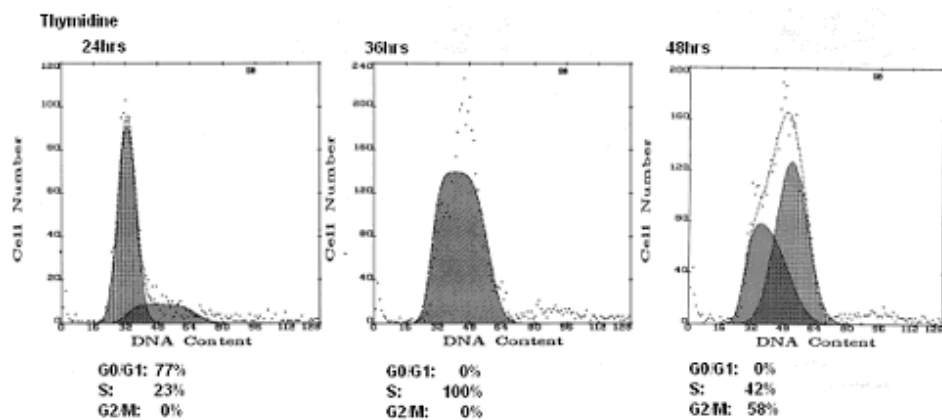**B**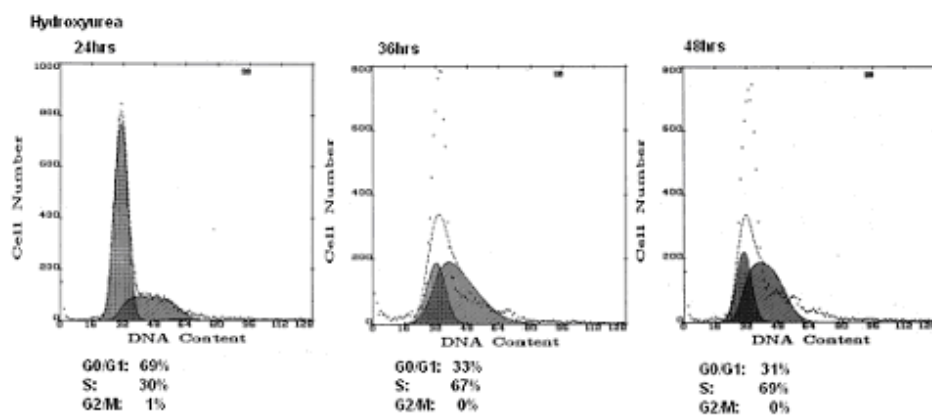**C**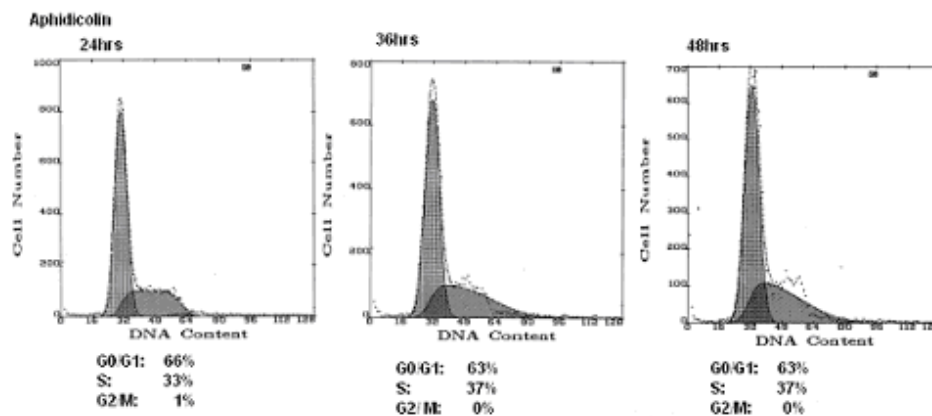

Supplement: pnas_102_7_2508__3.pdf [file pnas_102_7_2508__3.pdf]
